# Supplementary material
Source: MDPI journal article supplement (https://www.mdpi.com/2673-964X/3/4/22)
Supplement: s1 [file s1]

**Supplementary Material**

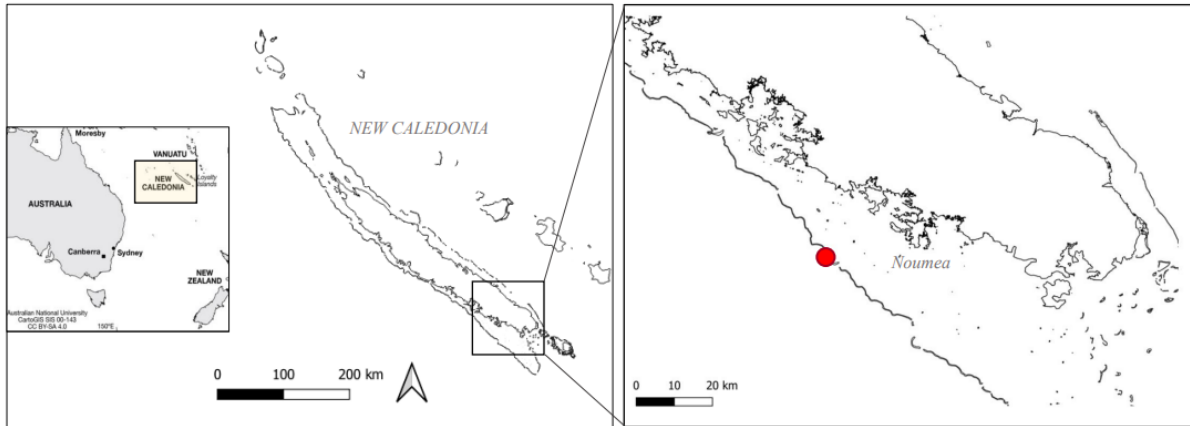

**Figure S1** Location of our study site at an outer reef slope in New Caledonia.

# Video Transect-Based Coral Demographic Investigation

Mohsen Kayal, Eva Mevrel & Jane Ballard

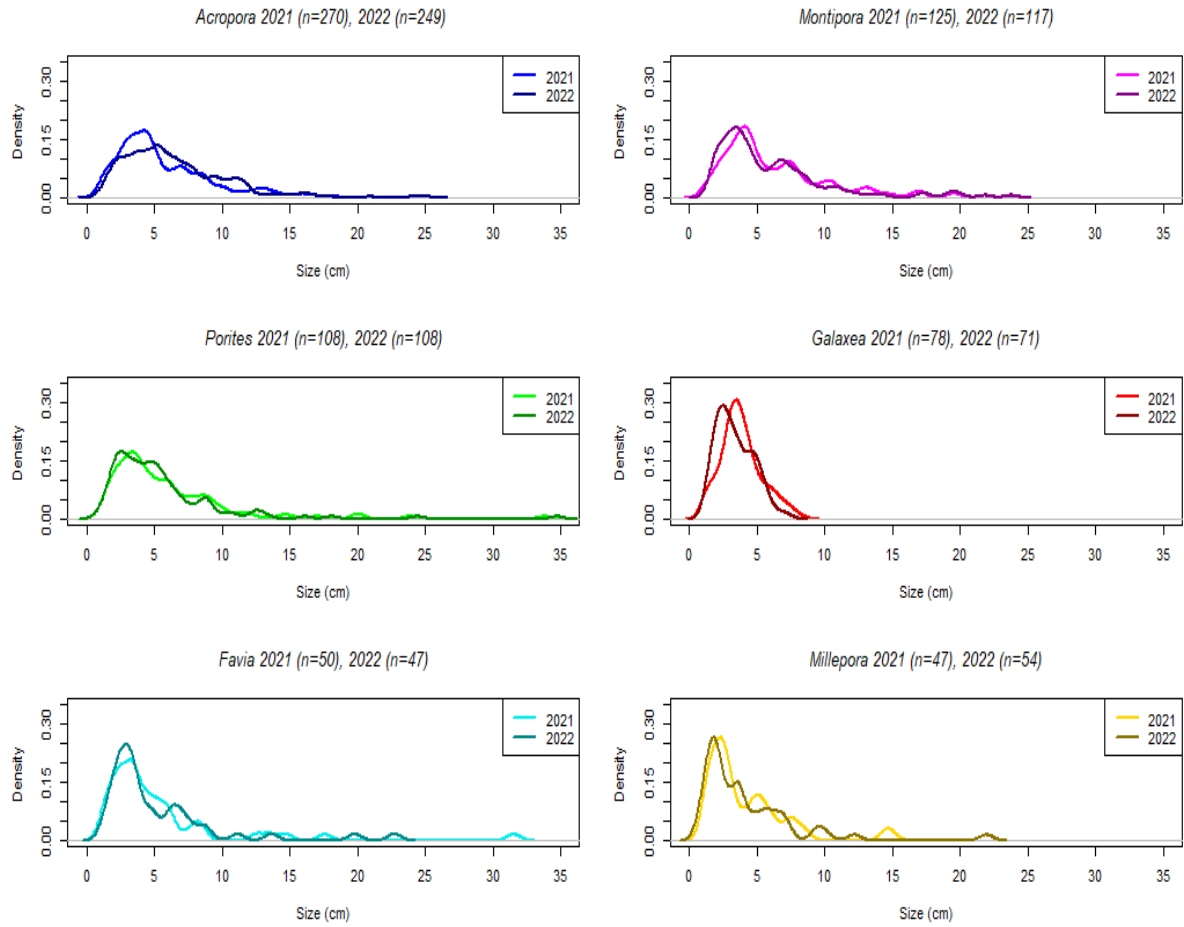

**Figure S2** Size distributions of populations of the six dominant coral genera in 2021 and 2022.

**Material S1** Python code for mapping and measuring corals in video transects.

```
import math
from optparse import Option
from tkinter import *
from cmath import pi
from colorsys import yiq_to_rgb
from pickle import FALSE
from re import X
import cv2
import math
import os
import tkinter
import tkinter.simpledialog
from tkinter import *
import statistics
import numpy as np
from pynput import mouse
import pandas as pd
import keyboard
import csv

## colors ##
colors = {'blue': (255, 0, 0), 'green': (0, 255, 0), 'red': (0, 0, 255),
'yellow': (0, 255, 255), 'magenta': (255, 0, 255),
'cyan': (255, 255, 0), 'white': (255, 255, 255), 'black': (0, 0, 0),
'gray': (125, 125, 125)}

def emptystring(string):
    answer = False
    if len(string) == 0:
        answer = True
    elif not string:
        answer = True
    elif string.isspace():
        answer = True
    return answer

def mainMenu():
    videosFolder = os.listdir(os.getcwd() + "/videos")

    def selected():
        chosenVid = clicked.get()
        videoPlayer(chosenVid)

    window=Tk()
    window.title('MeasureVids')
    window.geometry("470x270") #"960x540"

    clicked = StringVar()
    clicked.set(videosFolder[0])
    drop = OptionMenu(window, clicked, *videosFolder)
    drop.pack(pady=20)

    selection = Button(window, text="Choose this vid!", command=selected)
    selection.pack()
```

**Video Transect-Based Coral Demographic Investigation**  
Mohsen Kayal, Eva Mevrel & Jane Ballard

```
window.mainloop()

def videoPlayer(filename):
    pathCSV = os.getcwd()+"/CSVs/"
    path = os.getcwd()+"/videos/"+filename #before: create a folder named "videos"
    pathscreenshots = os.getcwd()+"/screenshots/"+filename+'/'
    if not os.path.exists(pathscreenshots):
        os.makedirs(pathscreenshots) #create folder Screenshots
        print('Creating a screenshot folder for ' + filename)
    if not os.path.exists(pathCSV): #create folder CSV
        os.makedirs(pathCSV)
        print('Creating a CSV folder for ' + filename)

    cap = cv2.VideoCapture(path)
    fps = cap.get(cv2.CAP_PROP_FPS) #frame per second

    ## global variables ##

    image_list = []
    coral_id_list = []
    genus_list = []
    morpho_list = []
    length_list = []
    width_list = []
    midlength_list = []
    midwidth_list = []
    centroid_list = []
    frame_list = []
    time_list = []
    scale_list = []
    col_tr_px_list = []
    col_tr_cm_list = []
    position_x_list = []
    angle_rota_list = []
    dynamic_list = []
    coral_id_long_list = []
    Dm_list = []
    pointA_list = []
    pointB_list = []
    pointC_list = []
    pointD_list = []
    penta_list = []
    fusion_fission_list = []
    size_difference_list = []
    frameNb = 0
    count=0
    coord = []
    roiPts = []
    scalepts = []
    choose_smp_ef = 40 #sampling effort over 0.8 meter width (40 centimeters on the left and on the right)

    # opening the CSV file
    # Comparison of csv transects in 2021 and 2022
    csvFile = pd.read_csv('Transect_6_2021.csv', sep=';')
    coral_id_2021 = csvFile['Individual_ID'].values.tolist()
    individual_2021 = csvFile['Individual_ID_short'].values.tolist()
```

## Video Transect-Based Coral Demographic Investigation

Mohsen Kayal, Eva Mevrel & Jane Ballard

```
size_2021 = csvFile['Mean_diameter'].values.tolist()
coral_morpho_id = csvFile['Morpho'].values.tolist()
coral_genus_id = csvFile['Genus'].values.tolist()
```

#program to scale each image relative to the transect tape

```
def scaling(event,x,y,flags,params):
    global imgetmp
    imgetmp = image
    global pixelScale
    global xAB, yAB

    if event == cv2.EVENT_RBUTTONDOWN: #if right click
        scalepts.append((x, y)) #add coordinates
        #print("scale pts:", x, y)
        #print(scalepts)
        cv2.circle(imgetmp, (x, y), 2, (255, 0, 0), -1) #display a circle

    if len(scalepts) == 2: #when two points have been picked out
        cv2.line(imgetmp, scalepts[0], (x, y), (255, 0, 0), 2) #line between the first and the second point
        xAB = scalepts[0][0] #x of the first point
        yAB = scalepts[0][1] #y of the first point
        xBB = scalepts[1][0] #x of the second point
        yBB = scalepts[1][1] #y of the second point
        pixelDimension = math.sqrt((xBB-xAB)**2 + (yBB-yAB)**2) #nb of pixels of the scale
        #print("ok", pixelDimension)
        metricDimension = tkinter.simpledialog.askfloat(title="Calibrate", prompt="Scale (cm):") #ask the
equivalent in centimeters
        pixelScale = metricDimension/pixelDimension #cm/pixel
        print("Size in cm/px : " + str(pixelScale))

        #if you want to add a horizontal line to restrain the width of the frame considered
        ymoy = int((yAB+yBB)/2) #at the middle of the scale
        xmoy = int((xAB+xBB)/2) #at the middle of the scale
        smp_ef = int(choose_smp_ef/pixelScale) #choose_smp has to be precised (in centimeters) at the
beginning
        cv2.line(imgetmp, (xmoy,ymoy), (xmoy+smp_ef, ymoy), (50, 0, 155), 2)
        cv2.line(imgetmp, (xmoy,ymoy), (xmoy-smp_ef, ymoy), (50, 0, 155), 2)

        scalepts.clear()

        return pixelScale
```

#program to annotate the frame

```
def annot(event, x, y, flags, params):
    global imgetmp
    imgetmp = image
    global xA, yA, xB, yB
    global Xcentroid1, Ycentroid1, lengthpx, length

    global count_unknown
    count_unknown = 0 #to count the unknown individuals

    if event == cv2.EVENT_LBUTTONDOWN: #if left click
```

## Video Transect-Based Coral Demographic Investigation

Mohsen Kayal, Eva Mevrel & Jane Ballard

```
roiPts.append((x, y)) #add coordinates
#print("roi just added:", x, y)
#print("roi points=", roiPts)
cv2.circle(imagetmp, (x, y), 2, (0, 0, 200), -1) #colored dots
if len(roiPts) == 2: #if two points have been picked out (ie length)
    cv2.line(imagetmp, roiPts[0], (x, y), (255, 0, 255), 2)
    #magenta line between the first and the second point
    xA = roiPts[0][0]
    yA = roiPts[0][1]
    xB = roiPts[1][0]
    yB = roiPts[1][1]
    lengthpx = math.sqrt((xB-xA)**2 + (yB-yA)**2)
    #print("length in px is:", lengthpx)
    length = pixelScale * lengthpx #length in cm
    print("real length in cm is:", length)
    length_list.append(round(length,1)) #round to one number after comma

Xcentroid1 = int((xA+xB)/2) #midlength
Ycentroid1 = int((yA+yB)/2) #midlength

midlength_list.append((Xcentroid1,Ycentroid1))
cv2.circle(imagetmp, (Xcentroid1, Ycentroid1), 2, (0, 255, 255), -1) #circle on the midlength

if len(roiPts) == 4: #4 points
    cv2.line(imagetmp, roiPts[2], (x, y), (50, 255, 50), 2)
    #line between the third and the fourth point
    xC = roiPts[2][0]
    yC = roiPts[2][1]
    xD = roiPts[3][0]
    yD = roiPts[3][1]
    widthpx = math.sqrt((xD-xC)**2 + (yD-yC)**2)
    #print("width in px is:", widthpx)
    width = pixelScale * widthpx
    print("real width in cm is:", width)
    width_list.append(round(width,1))

Xcentroid2 = int((xC+xD)/2) #midwidth
Ycentroid2 = int((yC+yD)/2) #midwidth

pointA_list.append((xA,yA))
pointB_list.append((xB,yB))
pointC_list.append((xC,yC))
pointD_list.append((xD,yD))

midwidth_list.append((Xcentroid2,Ycentroid2))
#cv2.circle(imagetmp, (Xcentroid2, Ycentroid2), 2, (0, 255, 255), -1) #circle on the midwidth

X_centroid = int((Xcentroid1+Xcentroid2)/2) #barycentre - could be considered as the centroid?
Y_centroid = int((Ycentroid1+Ycentroid2)/2) #barycentre - could be considered as the centroid?
centroid_list.append((X_centroid, Y_centroid))
#cv2.circle(imagetmp, (X_centroid, Y_centroid), 3, (0, 0, 255), -1) #midlength

#ellipse drawing
length_int = int(lengthpx/2) #divided by two otherwise too large
width_int = int(widthpx/2)
axesLength = (length_int, width_int)
if xB == xA:
```

## Video Transect-Based Coral Demographic Investigation

Mohsen Kayal, Eva Mevrel & Jane Ballard

```
xB = xB+1 #cannot divide by zero
fkslope = (yB-yA)/(xB-xA)
if fkslope < 0: #properties of arctan: if arg is negative then results is underestimated
    angle = 180 - ((np.arctan(math.sqrt((yA-yB)**2)/math.sqrt((xA-xB)**2)))*(180/pi))
else:
    angle = (np.arctan(math.sqrt((yA-yB)**2)/math.sqrt((xA-xB)**2)))*(180/pi)
#print(angle)
angle_rota_list.append(angle)
cv2.ellipse(imagetmp, (Xcentroid1,Ycentroid1), axesLength, angle, 0, 360, (0, 100, 205), 2) #centroid =
middle of the length

Dm_cm = (length+width)/2 #mean diameter
Dm_list.append(Dm_cm)
roiPts.clear()

identification = tkinter.simpledialog.askstring(title="Identification", prompt="genus_morpho:")
while emptystring(identification):
    identification = tkinter.simpledialog.askstring(title="Identification", prompt="genus_morpho:")
font = cv2.FONT_HERSHEY_SIMPLEX

word_split = identification.split('_') #split genus and morpho
genus = word_split[0]
morpho = word_split[1]
if len(word_split) == 3: #if it is 'genus_morpho_comment' (3 components)
    fu-fi = word_split[2] #fusion or fission
else:
    fu-fi = 'NA'

genus_list.append(genus)
if genus == "unk": #if unknown
    count_unknown +=1 #to know how many unknown are identified; can be #
    #ID_list.append(str(uuid.uuid4())[:8]) #random coral ID
    frame_list.append(frameNb) #add frame n°
    image_list.append(filename+'_'+idCapture+".png") #add image name
    time_list.append(time) #add time in the video
    scale_list.append(pixelScale) #add scale in cm/px

##position Y (distance between the colony centroid and the transect) --> relative to the transect width
distance_col_tr_px = math.sqrt((xAB-Xcentroid1)**2)
#print("distance from the colony to the transect in px is:", distance_col_tr_px)
col_tr_px_list.append(round(distance_col_tr_px))

penta_list.append((xAB,yAB)) #coordinates of the transect tape

distance_col_tr_cm = distance_col_tr_px * pixelScale
print("Real distance from the colony to the transect in cm is:", distance_col_tr_cm)
if Xcentroid1 < xAB: #colony on the left side of the transect
    distance_col_tr_cm = - distance_col_tr_cm #negative on the left

col_tr_cm_list.append(round(distance_col_tr_cm))

##position X (position on the transect (100cm, 120cm,...)) --> relative to the transect length
position_tr = tkinter.simpledialog.askfloat(title="Transect graduation", prompt="Position on the
transect (cm):")
#print("Coral colony located at:", position_tr)
position_x_list.append(position_tr)
coral_id = genus+'_'+morpho+'_'+str(round(position_tr))
```

## Video Transect-Based Coral Demographic Investigation

Mohsen Kayal, Eva Mevrel & Jane Ballard

```
if morpho == "ma":
    morpho = 'massive'
elif morpho == "sm":
    morpho = 'submassive'
elif morpho == 'fo':
    morpho = 'foliose'
elif morpho == 'br':
    morpho = 'branched'
elif morpho == 'en':
    morpho = 'encrusting'
elif morpho == 'ta':
    morpho = 'tabular'
elif morpho == 'so':
    morpho = 'solitary'
print("morpho is:", morpho)
morpho_list.append(morpho)

coral_id_list.append(coral_id) #ID short is: genus_morpho_x
fusion_fission = 'NA'
size_difference = 'NA'

# coral_id_long = coral_id+'_2021'
# coral_id_long_list.append(coral_id_long)
#dynamic = 'NA'
#dynamic_list.append(dynamic)

#comparison to 2021
if coral_id in individual_2021: #if the coral has been seen before (coral of 2022 % list 2021)
    coral_id_long = coral_id+'_2021'
    coral_id_long_list.append(coral_id_long)

for i in range(0, len(coral_id_2021)):
    name = coral_id_2021[i]
    if coral_id_long == name: #if they have the same name (on row i)
        if Dm_cm >= size_2021[i]: #if coral 2022 is larger than 2021
            if 'fu' in fu_fi:
                dynamic = 'fusion_growth'
                dynamic_list.append(dynamic)
                fusion_fission = tkinter.simpledialog.askstring(title="Fusion", prompt="Fusion with which
colony? 'genus_morpho_x_year'")
                print("the coral has grown and merged with", fusion_fission)
            elif 'fi' in fu_fi:
                dynamic = 'fission_growth'
                dynamic_list.append(dynamic)
                fusion_fission = tkinter.simpledialog.askstring(title="Fission", prompt="Fission from which
colony? 'genus_morpho_x_year'")
                print("the coral has grown and split into", fusion_fission) #takes the larger coral for fi
            else:
                dynamic = "growth"
                dynamic_list.append(dynamic)
                print("the coral has grown")

        else: #if the coral has shrunk
            if 'fu' in fu_fi:
                dynamic = 'fusion_shrinkage'
                dynamic_list.append(dynamic)
```



## Video Transect-Based Coral Demographic Investigation

Mohsen Kayal, Eva Mevrel & Jane Ballard

```
        fusion_fission = tkinter.simpledialog.askstring(title="Fusion", prompt="Fusion with which
colony? 'genus_morpho_x_year'")
        print("the coral has shrunk and merged with", fusion_fission) #the smaller colony
        elif 'fi' in fu_fi:
            dynamic = 'fission_shrinkage'
            dynamic_list.append(dynamic)
            fusion_fission = tkinter.simpledialog.askstring(title="Fission", prompt="Fission from which
colony? 'genus_morpho_x_year'")
            print("the coral has shrunk and split into", fusion_fission)
        else:
            dynamic = "shrinkage"
            dynamic_list.append(dynamic)
            print("the coral has shrunk")
        size_difference = Dm_cm - size_2021[i]

        print('size difference between 2021 and 2022:', size_difference)

    else: #coral not seen in 2021; new
        coral_id_long = coral_id+'_2022' #new id with 2022
        coral_id_long_list.append(coral_id_long)

        dynamic = tkinter.simpledialog.askstring(title="Dynamic", prompt="Coral status: (r: recruit, mi:
missed, fu: fusion, fi: fission, mig : migrant)")
        if dynamic == 'r':
            dynamic = 'recruit'
            print("This coral is a new recruit") #small colony
        elif dynamic == 'mi':
            dynamic = 'missed'
            print("This coral was missed") #camera angle, resolution, edge, etc.
        elif dynamic == 'fi':
            dynamic = 'fission'
            fusion_fission = tkinter.simpledialog.askstring(title="Fission", prompt="Fission from which
colony? 'genus_morpho_x_year'")

            print("This coral comes from a fission from the colony:", fusion_fission) #the smaller part is
considered
        elif dynamic == 'mig':
            dynamic = 'migrant'
            print("This coral is a new fragment or a migrant") #for solitary corals (ex: fungia), fragments...
        elif dynamic == 'fu':
            dynamic = 'fusion'
            fusion_fission = tkinter.simpledialog.askstring(title="Fusion", prompt="Fusion with which colony?
'genus_morpho_x_year'")

            print("This coral comes from a fusion from the colony:", fusion_fission)
            dynamic_list.append(dynamic)
            fusion_fission_list.append(fusion_fission)
            size_difference_list.append(size_difference)

# screen_width = image.shape[1]
# text_x_pos = None
# text_y_pos = y
# if x < (screen_width/2): #if you annotate a colony on the left:
#     text_x_pos = int(x + 5) #text on the right
# else:
#     text_x_pos = int(x - 5) #annotation on the right --> text on the left
```

## Video Transect-Based Coral Demographic Investigation

Mohsen Kayal, Eva Mevrel & Jane Ballard

```
cv2.putText(imagetmp, coral_id_long, (xA,yA), font, 0.5, (0, 255, 255), 2) #coral_id_year next year

print("You may select your next point!")

def main(event,x,y,flags,params): #the main program used

    scaling(event,x,y,flags,params) #call for scaling first
    annot(event,x,y,flags,params) #call for annotationg function

while cap.isOpened(): #while the video is running

    ret, frame = cap.read()
    resized = cv2.resize(frame, (960,540), interpolation = cv2.INTER_LINEAR) #small screen: 960,540 // bigger
screen: 1366,768
    video = cv2.imshow("Video LIT test", resized) #show video resized

    if ret == True: #if the video is played:
        key = cv2.waitKey(1) #1000/fps) #1000ms/ nb frame per s
        frameNb +=1

    if key == ord('e'): #if press E

        #frameNb = cap.get(CAP_PROP_POS_FRAMES)
        idCapture = str(frameNb) #str(uuid.uuid4())[:8] #uuid gives a random ID (chr)
        time = frameNb/fps #time of the frame
        print("Frame number:" + idCapture)
        print("Time (s):" + str(time))
        imgname = pathscreenshots+filename+'nonannot_'+idCapture+".png"

        cv2.imwrite(imgname, frame) #save screen
        imagefirst = cv2.imread(imgname)
        image = cv2.resize(imagefirst, (1100,575), interpolation = cv2.INTER_LINEAR) #resized
        print("Please press left to get the coordinates, press right to calibrate")

        cv2.namedWindow('Image mouse')
        cv2.imshow('Image mouse', image)
        cv2.setMouseCallback('Image mouse', scaling)

    while True:
        # Show image 'Image mouse':
        cv2.namedWindow('Image mouse')
        cv2.imshow('Image mouse', image) #shows the frame considered
        cv2.setMouseCallback('Image mouse', main)

    if cv2.waitKey(int(1000/fps)) & 0xFF == ord('q'): #press q to quit
        coord.clear()
        imgnameAnnot = pathscreenshots+filename+'annot_'+idCapture+".png"
        cv2.imwrite(imgnameAnnot, imagetmp) #save screen annotated

        # Create a dictionary using lists
        data = {'Individual_ID' : coral_id_long_list, 'Individual_ID_short' : coral_id_list, 'Genus':genus_list,
'Morpho':morpho_list, 'Length_cm' : length_list, 'Width_cm': width_list, 'Mean_diameter': Dm_list,
'Position_Y_cm': col_tr_cm_list, 'Position_X_cm': position_x_list, 'Dynamic': dynamic_list, 'Size_difference (cm)'
: size_difference_list, 'Fusion/Fission' : fusion_fission_list,'Position_Y_px': col_tr_px_list,'Image': image_list,
'Frame_Number': frame_list, 'Frame_Time': time_list, 'Scale_cm/px' : scale_list, 'Centroid' : centroid_list,
'Mid_Length' : midlength_list, 'Mid_Width' : midwidth_list, 'Ellipse_Angle' : angle_rota_list, 'Point_A':
pointA_list,'Point_B': pointB_list,'Point_C': pointC_list,'Point_D': pointD_list, 'Scale_position' : penta_list}
```

## Video Transect-Based Coral Demographic Investigation

Mohsen Kayal, Eva Mevrel & Jane Ballard

```
# Create the Pandas DataFrame
df = pd.DataFrame(data)
#print()
#print(df)
#print()
# Export the dataframe to a csv file
df.to_csv(pathCSV + filename + '.csv', index = False, header=True, sep=';') #use ';' as sep even
though ',' is the real separator
#https://stackoverflow.com/questions/63244161/why-is-pandas-to-csv-comma-seperating-not-
working

if count_unknown != 0:
    print('You have',count_unknown, 'coral unknown on the frame', frameNb)
    break

# Destroy all generated windows:
cv2.destroyAllWindows()
count += 1

#### ----- at the end of the video ----- ####

if key == 27: #press esc to quit
    print("End of the video")
    break

else:
    break

cap.release()
cv2.destroyAllWindows()

## uncomment when you want to work on the second year
# below

#at the end of the program, if a coral in 2021 has not been encountered in 2022:

v = len(coral_id_2021) #list of ID of the transect 6 2022
df_f = df
for q in range(v):
    if coral_id_2021[q] not in coral_id_long_list: #check on genus_morpho_x_year
        new_row = {'Individual_ID' : coral_id_2021[q], 'Individual_ID_short': individual_2021[q],
'Genus':coral_genus_id[q], 'Morpho':coral_morpho_id[q], 'Length_cm ': 0, 'Width_cm': 0, 'Mean_diameter': 0,
'Position_Y_cm': 'NA', 'Position_X_cm': 'NA', 'Dynamic' : 'Absent', 'Size_difference (cm)': 'NA', 'Fusion/Fission' :
'NA', 'Position_Y_px': 'NA', 'Image': 'NA', 'Frame_Number': 'NA', 'Frame_Time': 'NA', 'Scale_cm/px' :
'NA', 'Centroid': 'NA', 'Mid_Length' : 'NA', 'Mid_Width' : 'NA', 'Ellipse_Angle' : 'NA', 'Point_A': 'NA', 'Point_B':
'NA', 'Point_C': 'NA', 'Point_D': 'NA', 'Scale_position': 'NA'}
        df_new_row = pd.DataFrame(new_row, index=[0])
        df_f = pd.concat([df_new_row, df_f])

print(df_f)
df_f.to_csv(pathCSV + filename + 'with_absent.csv', index = False, header=True, sep=';')

mainMenu()
```

**Video Transect-Based Coral Demographic Investigation**  
Mohsen Kayal, Eva Mevrel & Jane Ballard

**Table S1** Population abundances (n per 4 m<sup>2</sup>) and relative genera contributions (%) in our surveys of coral communities in 2021 and 2022.

| <b>2021</b>         |                  |            | <b>2022</b>         |                  |            |
|---------------------|------------------|------------|---------------------|------------------|------------|
| <b>Genus</b>        | <b>Abundance</b> | <b>%</b>   | <b>Genus</b>        | <b>Abundance</b> | <b>%</b>   |
| <i>Acropora</i>     | 270              | 30.2       | <i>Acropora</i>     | 249              | 29.7       |
| <i>Montipora</i>    | 125              | 14         | <i>Montipora</i>    | 117              | 14         |
| <i>Porites</i>      | 108              | 12.1       | <i>Porites</i>      | 108              | 12.9       |
| <i>Galaxea</i>      | 78               | 8.7        | <i>Galaxea</i>      | 71               | 8.5        |
| <i>Favia</i>        | 50               | 5.6        | <i>Millepora</i>    | 54               | 6.4        |
| <i>Millepora</i>    | 47               | 5.3        | <i>Favia</i>        | 47               | 5.6        |
| <i>Stylophora</i>   | 41               | 4.6        | <i>Stylophora</i>   | 31               | 3.7        |
| <i>Goniastrea</i>   | 26               | 2.9        | <i>Goniastrea</i>   | 25               | 3          |
| <i>Pavona</i>       | 23               | 2.6        | <i>Pavona</i>       | 25               | 3          |
| <i>Favites</i>      | 21               | 2.3        | <i>Lobophyllia</i>  | 19               | 2.3        |
| <i>Lobophyllia</i>  | 20               | 2.2        | <i>Favites</i>      | 16               | 1.9        |
| <i>Montastrea</i>   | 15               | 1.7        | <i>Montastrea</i>   | 15               | 1.8        |
| <i>Pocillopora</i>  | 14               | 1.6        | <i>Pocillopora</i>  | 11               | 1.3        |
| <i>Fungia</i>       | 11               | 1.2        | <i>Fungia</i>       | 10               | 1.2        |
| <i>Seriatopora</i>  | 11               | 1.2        | <i>Seriatopora</i>  | 10               | 1.2        |
| <i>Leptoseris</i>   | 6                | 0.7        | <i>Turbinaria</i>   | 5                | 0.6        |
| <i>Turbinaria</i>   | 5                | 0.6        | <i>Echinopora</i>   | 4                | 0.5        |
| <i>Echinopora</i>   | 4                | 0.4        | <i>Leptoseris</i>   | 4                | 0.5        |
| <i>Platygyra</i>    | 4                | 0.4        | <i>Platygyra</i>    | 4                | 0.5        |
| Unidentified        | 4                | 0.4        | Unidentified        | 4                | 0.5        |
| <i>Acanthastrea</i> | 2                | 0.2        | <i>Acanthastrea</i> | 2                | 0.2        |
| <i>Leptoria</i>     | 2                | 0.2        | <i>Leptoria</i>     | 2                | 0.2        |
| <i>Pachyseris</i>   | 2                | 0.2        | <i>Psammocora</i>   | 2                | 0.2        |
| <i>Psammocora</i>   | 2                | 0.2        | <i>Astreopora</i>   | 1                | 0.1        |
| <i>Astreopora</i>   | 1                | 0.1        | <i>Isopora</i>      | 1                | 0.1        |
| <i>Cyphastrea</i>   | 1                | 0.1        | <i>Pachyseris</i>   | 1                | 0.1        |
| <i>Hydnophora</i>   | 1                | 0.1        |                     |                  |            |
| <b>Total</b>        | <b>894</b>       | <b>100</b> | <b>Total</b>        | <b>838</b>       | <b>100</b> |

**Video Transect-Based Coral Demographic Investigation**  
Mohsen Kayal, Eva Mevrel & Jane Ballard

**Table S2** Kolmogorov-Smirnov test results comparing size distributions of the six dominant coral genera in 2021 and 2022. \* for  $p < 0.05$ , \*\* for  $p < 0.005$ , \*\*\* for  $p < 0.0005$ , *ns* for non-significant.

| <b>2021</b>      |                 |                  |                |                |              |                |                  |
|------------------|-----------------|------------------|----------------|----------------|--------------|----------------|------------------|
|                  | <i>Acropora</i> | <i>Montipora</i> | <i>Porites</i> | <i>Galaxea</i> | <i>Favia</i> | Mean size (cm) | Median size (cm) |
| <i>Acropora</i>  | -               | -                | -              | -              | -            | 5.7            | 4.5              |
| <i>Montipora</i> | <i>ns</i>       | -                | -              | -              | -            | 6.3            | 4.9              |
| <i>Porites</i>   | <i>ns</i>       | <i>ns</i>        | -              | -              | -            | 6.0            | 4.5              |
| <i>Galaxea</i>   | ***             | ***              | **             | -              | -            | 3.8            | 3.6              |
| <i>Favia</i>     | <i>ns</i>       | *                | <i>ns</i>      | <i>ns</i>      | -            | 5.3            | 3.6              |
| <i>Millepora</i> | **              | ***              | **             | *              | <i>ns</i>    | 4.1            | 2.9              |

  

| <b>2022</b>      |                 |                  |                |                |              |                |                  |
|------------------|-----------------|------------------|----------------|----------------|--------------|----------------|------------------|
|                  | <i>Acropora</i> | <i>Montipora</i> | <i>Porites</i> | <i>Galaxea</i> | <i>Favia</i> | Mean size (cm) | Median size (cm) |
| <i>Acropora</i>  | -               | -                | -              | -              | -            | 6.4            | 5.5              |
| <i>Montipora</i> | <i>ns</i>       | -                | -              | -              | -            | 6.1            | 4.7              |
| <i>Porites</i>   | *               | <i>ns</i>        | -              | -              | -            | 5.6            | 4.5              |
| <i>Galaxea</i>   | ***             | ***              | ***            | -              | -            | 3.4            | 3.2              |
| <i>Favia</i>     | ***             | <i>ns</i>        | <i>ns</i>      | *              | -            | 5.1            | 3.6              |
| <i>Millepora</i> | ***             | **               | *              | <i>ns</i>      | <i>ns</i>    | 4.1            | 3.3              |
